# Supplementary material for: A novel semi-aromatic polyamide TFC reverse osmosis membrane fabricated from a dendritic molecule of trimesoylamidoamine through a two-step amine-immersion mode
Source: Royal Society of Chemistry journal article supplement (doi:10.1039/c7ra07298h), 2017-01-01
Supplement: c7ra07298h1.pdf [file c7ra07298h1.pdf]

## Supporting information

# A novel semi-aromatic polyamide TFC reverse osmosis membrane fabricated from a dendritic molecule of trimesoylamidoamine through a two-step amine-immersion mode

*Xiao-Lin Chen<sup>a,b,†</sup>, Hao Wu<sup>a,b,†</sup>, Xiang Huang<sup>a,b</sup>, Hui-Min Ruan<sup>a,c</sup>, Yan-Li Ji<sup>a,c,\*\*</sup>, Li-Fen Liu<sup>a,c,\*</sup>, Cong-Jie Gao<sup>a,c</sup>*

<sup>a</sup> Center for Membrane and Water Science and Technology, Ocean College, Zhejiang University of Technology, Hangzhou 310014, China;

<sup>b</sup> College of Chemical Engineering, Zhejiang University of Technology, Hangzhou 310014, China.

<sup>c</sup> Collaborative Innovation Center of Membrane Separation and Water Treatment of Zhejiang Province, Hangzhou 310014, China.

† These authors contributed equally.

\* Corresponding author: lifenliu@zjut.edu.cn, Tel: +86-571-88325373, Fax: +86-571-88325373;

\*\* Corresponding author: yanliji@zjut.edu.cn.

**Table S1** Composition of the West Lake water after microfiltration

| Species                                   | Quantity |
|-------------------------------------------|----------|
| K <sup>+</sup> and Na <sup>+</sup> , mg/l | 12.0     |
| Ca <sup>2+</sup> , mg/l                   | 30.8     |
| Mg <sup>2+</sup> , mg/l                   | 2.3      |
| Fe <sub>(Total)</sub> , mg/l              | 0.03     |
| HCO <sub>3</sub> <sup>-</sup> , mg/l      | 79.6     |
| Cl <sup>-</sup> , mg/l                    | 20.0     |
| SO <sub>4</sub> <sup>2-</sup> , mg/l      | 18.4     |
| HA, mg/l                                  | <5       |
| NO <sub>2</sub> <sup>-</sup> , mg/l       | 10.8     |
| SiO <sub>2</sub> , mg/l                   | 8.0      |
| Turbidity, NTU                            | 0.8      |
| COD <sub>(Mn)</sub> , mg/l                | 4.3      |
| Bacteria, CFU/ml                          | <150     |

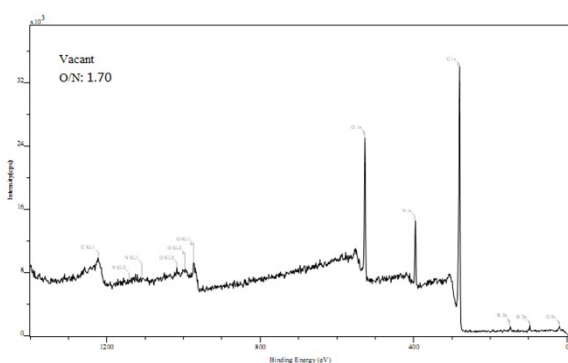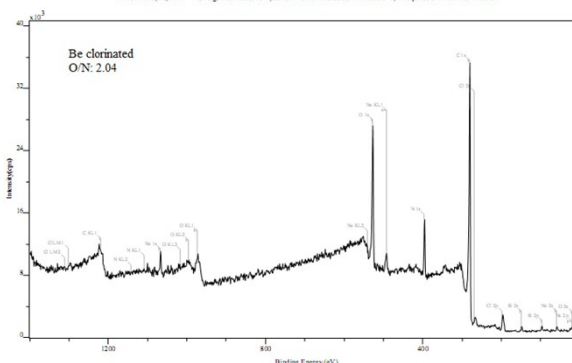

i) MPD-TMC membrane

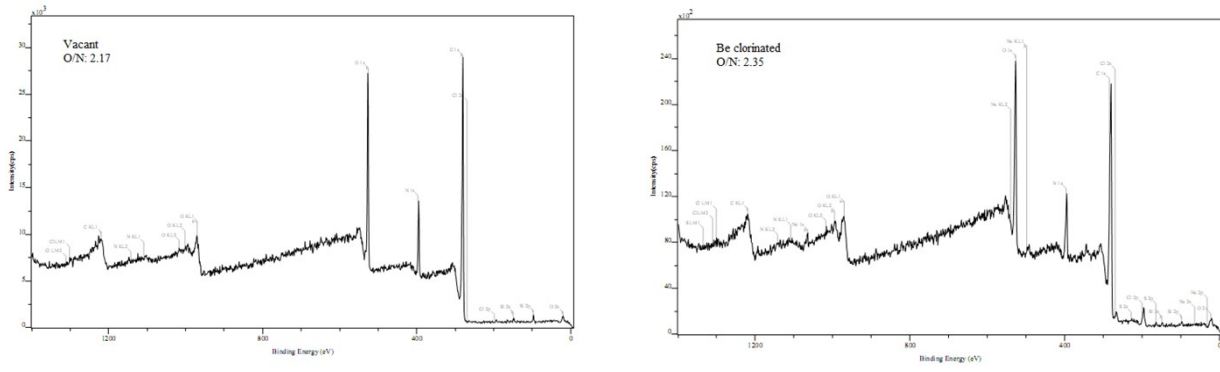

ii) DAP-TMAAM-TMC membrane

**Figure S1** Variation of elemental composition from XPS analysis before and after chlorination of the RO membranes.
